# Supplementary material for: Activity profiling and crystal structures of inhibitor-bound SARS-CoV-2 papain-like protease: A framework for anti–COVID-19 drug design
Source: PubMed Central journal article supplement — Sci Adv. 2020 Oct 16;6(42):eabd4596. doi: 10.1126/sciadv.abd4596 (PMC7567588; doi:10.1126/sciadv.abd4596), 2020-10-16

## Supplementary Materials for

### **Activity profiling and crystal structures of inhibitor-bound SARS-CoV-2 papain-like protease: A framework for anti-COVID-19 drug design**

Wioletta Rut\*, Zongyang Lv, Mikolaj Zmudzinski, Stephanie Patchett, Digant Nayak, Scott J. Snipas, Farid El Oualid, Tony T. Huang\*, Miklos Bekes\*, Marcin Drag\*, Shaun K. Olsen\*

\*Corresponding author. Email: [wioletta.rut@pwr.edu.pl](mailto:wioletta.rut@pwr.edu.pl) (W.R.); [tony.huang@nyulangone.org](mailto:tony.huang@nyulangone.org) (T.T.H.); [miklosbekes@icloud.com](mailto:miklosbekes@icloud.com) (M.B.); [olsens@uthscsa.edu](mailto:olsens@uthscsa.edu) (S.K.O.); [marcin.drag@pwr.edu.pl](mailto:marcin.drag@pwr.edu.pl) (M.D.)

Published 16 October 2020, *Sci. Adv.* **6**, eabd4596 (2020)  
DOI: 10.1126/sciadv.abd4596

#### **This PDF file includes:**

Figs. S1 to S3  
Tables S1 to S3

### Ac-Leu-Arg-P2-Gly-ACC

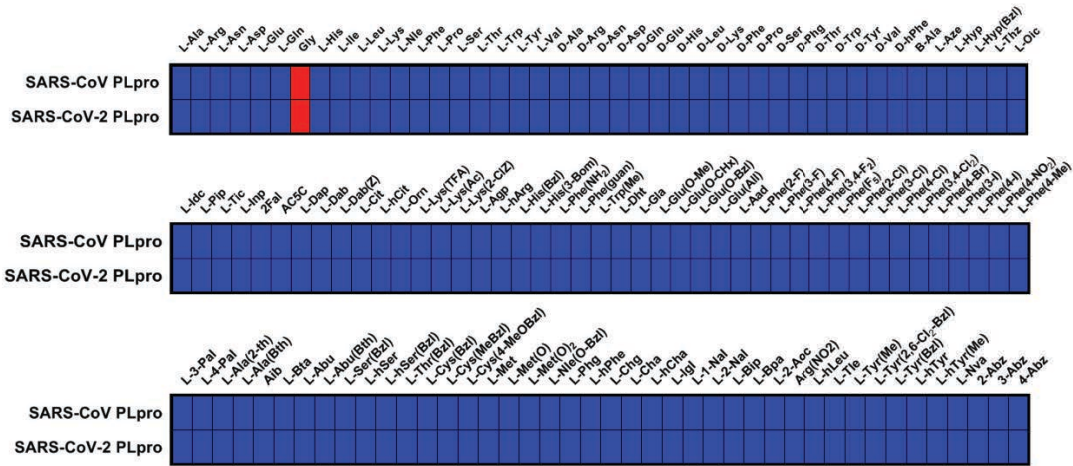

### Ac-Mix-P3-Gly-Gly-ACC

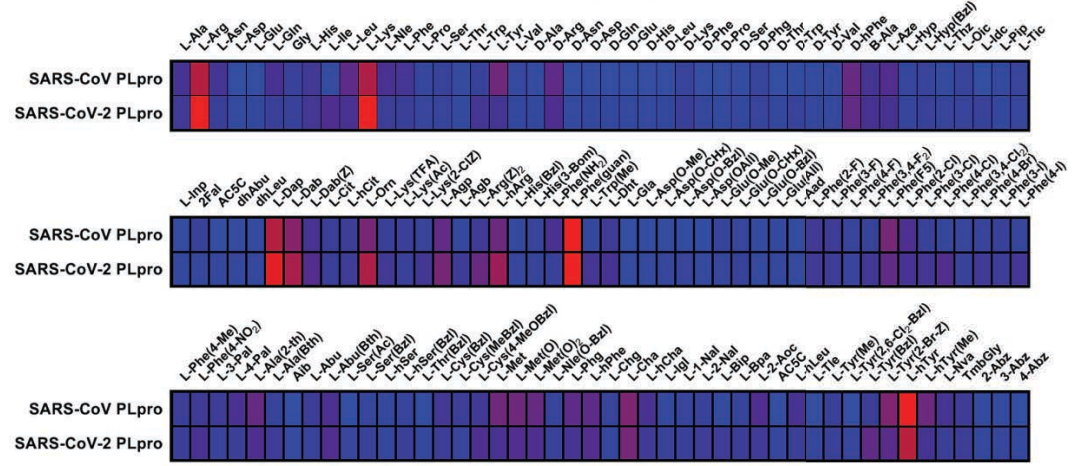

### Ac-P4-Mix-Gly-Gly-ACC

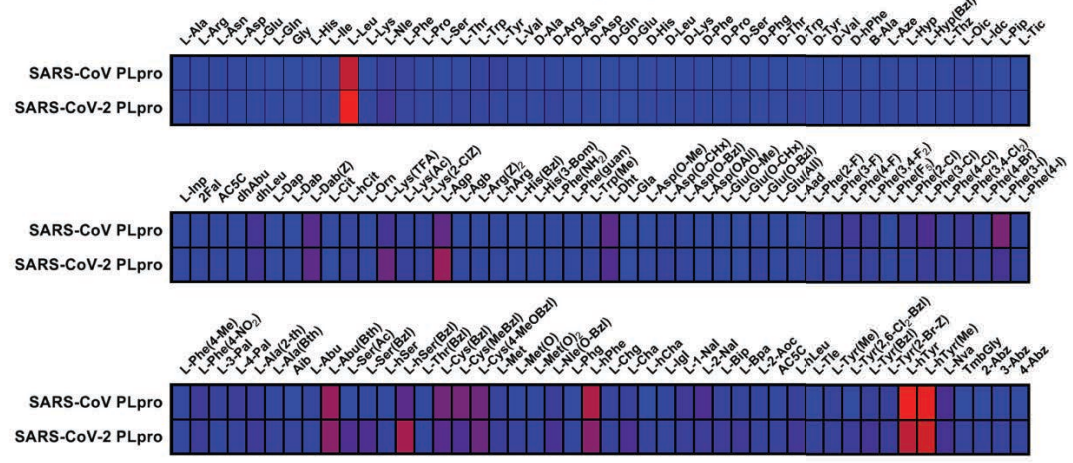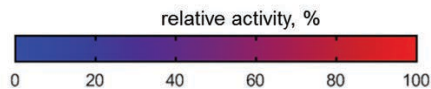

Supplementary Figure 1. SARS-CoV-PLpro and SARS-CoV-2-PLpro substrate specificity profiles presented as heat maps.

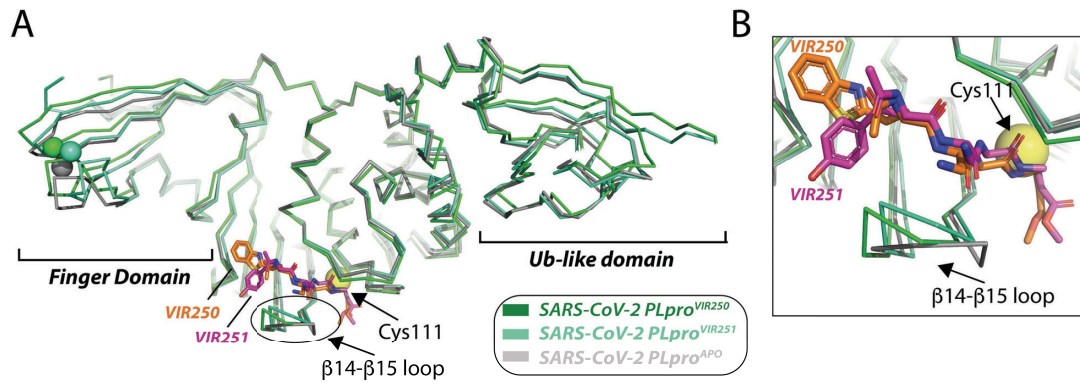

**Supplementary Figure 2. Comparison of apo versus VIR250 and VIR251 bound SARS-CoV-2 PLpro.** (A) The indicated structures were superimposed and are shown as ribbons. Zinc atoms are shown as spheres, colored according to their representative structure. Regions of conformational variability between apo and VIR250 and VIR251 structures are labeled including the Finger Domain, the Ub-like domain, and the  $\beta$ 14- $\beta$ 15 loop. Catalytic cysteine 111 of SARS-CoV-2 PLpro is shown as sticks with its sg atom shown as yellow sphere. (B) Magnified view of the conformational differences around the  $\beta$ 14- $\beta$ 15 loop of SARS-CoV-2 PLpro.

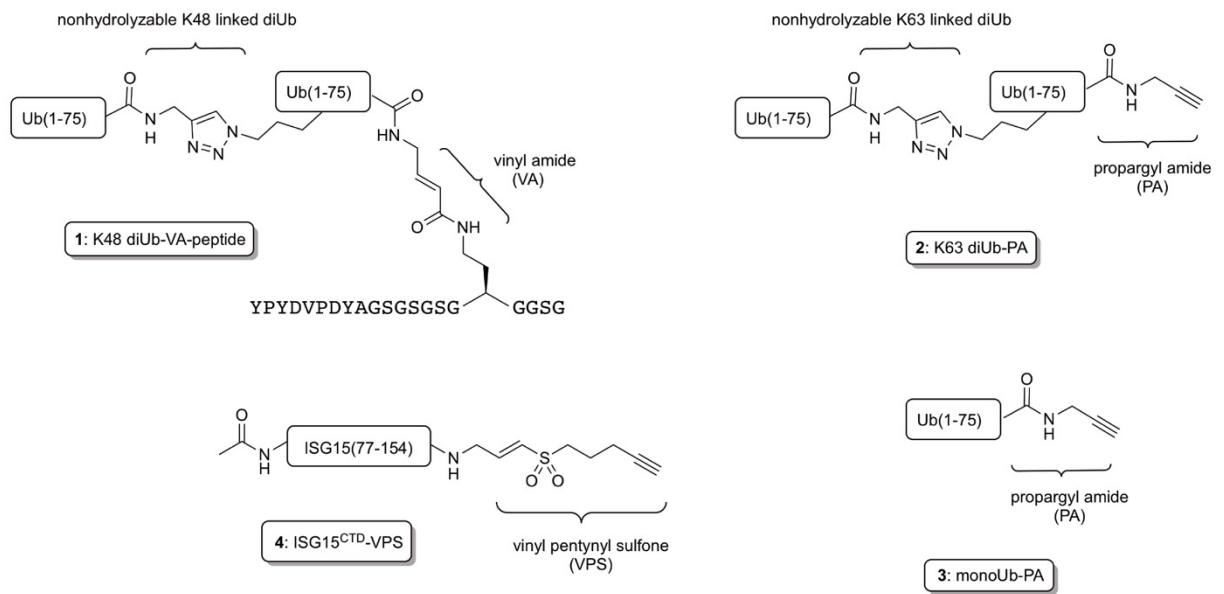

Supplementary Figure 3. Chemical structures of the Ub/Ubl activity based probes used in Figure 4B.

**Table S1.** Structures of fixed natural and unnatural amino acids used in the combinatorial library.

| No | Structure + code                                                                          | No | Structure + code                                                                          | No | Structure + code                                                                            |
|----|-------------------------------------------------------------------------------------------|----|-------------------------------------------------------------------------------------------|----|---------------------------------------------------------------------------------------------|
| 1  | 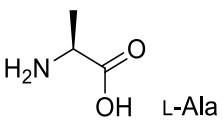 L-Ala   | 2  |  L-Arg   | 3  |  L-Asn   |
| 4  |  L-Asp   | 5  |  L-Gln   | 6  |  L-Glu   |
| 7  |  Gly    | 8  |  L-His  | 9  |  L-Ile  |
| 10 |  L-Leu | 11 |  L-Lys | 12 |  L-Nle |
| 13 |  L-Phe | 14 |  L-Pro | 15 |  L-Ser |
| 16 |  L-Thr | 17 |  L-Trp | 18 |  L-Tyr |

19

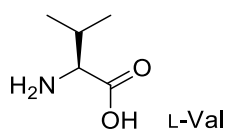

20

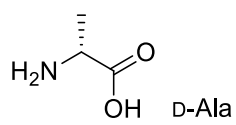

21

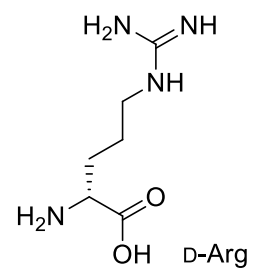

22

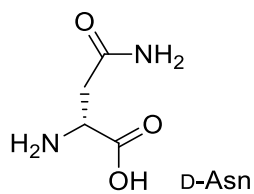

23

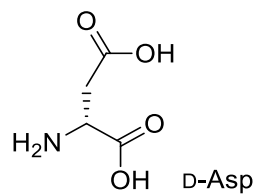

24

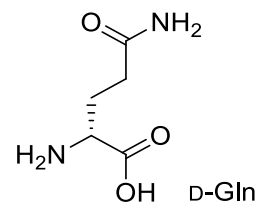

25

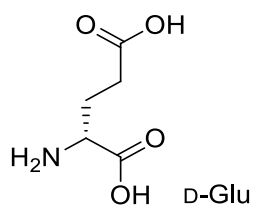

26

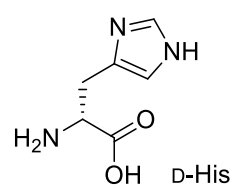

27

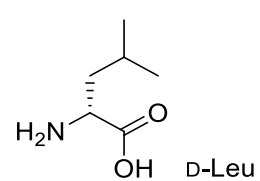

28

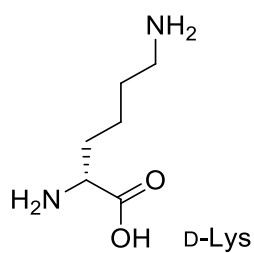

29

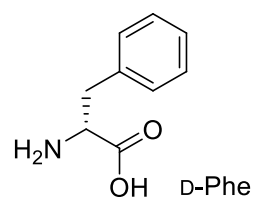

30

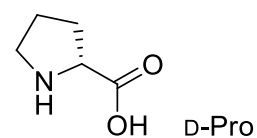

31

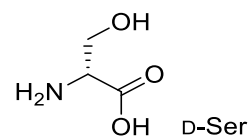

32

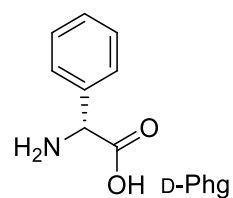

33

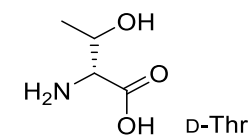

34

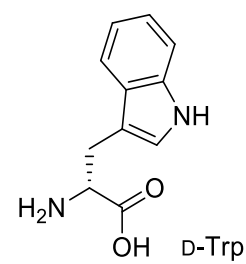

35

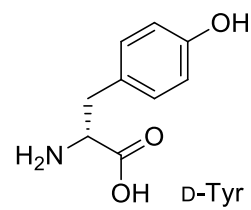

36

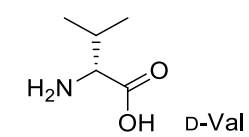

37

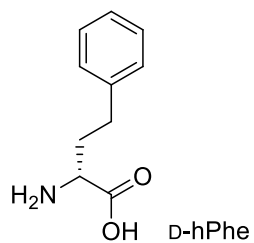

38

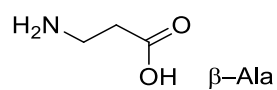

39

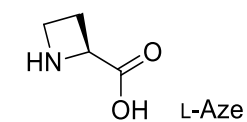

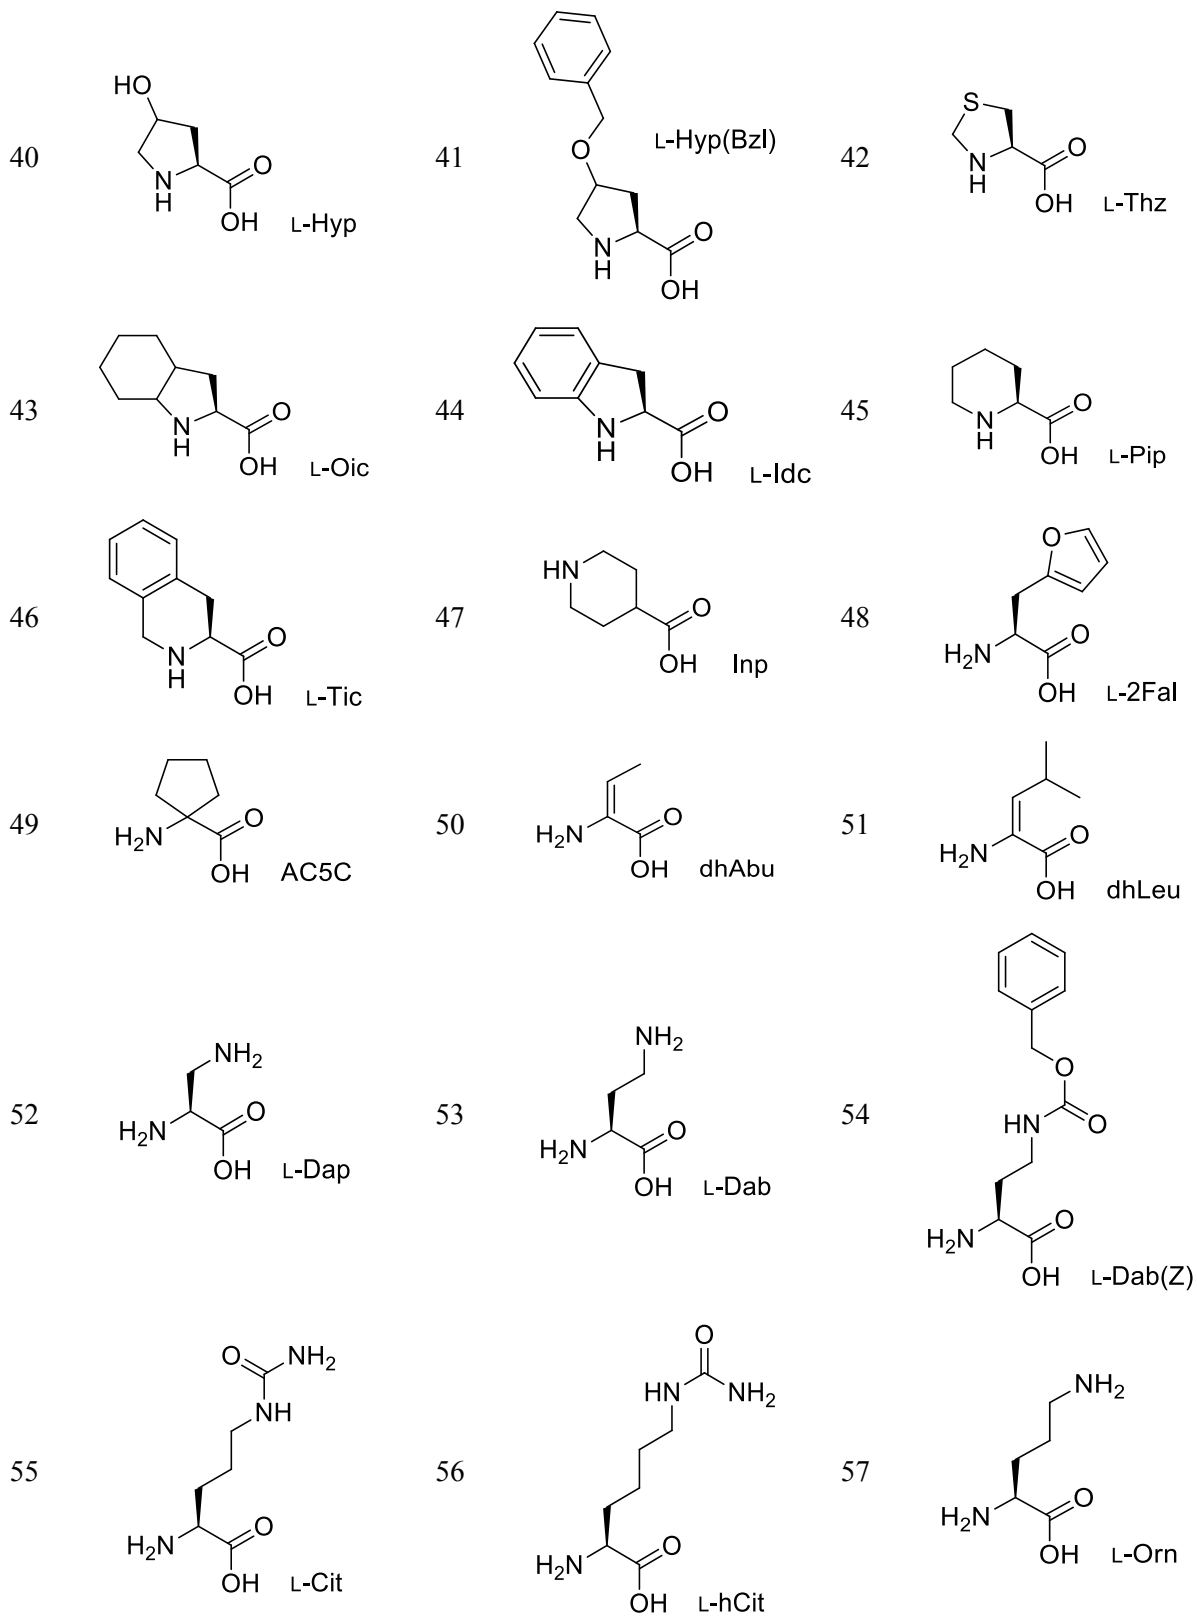

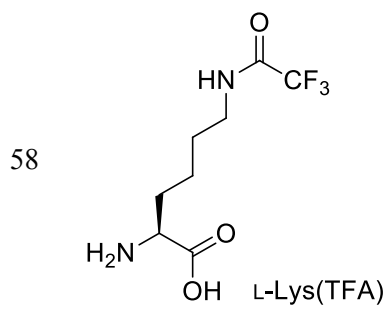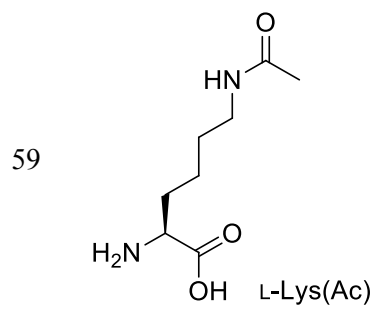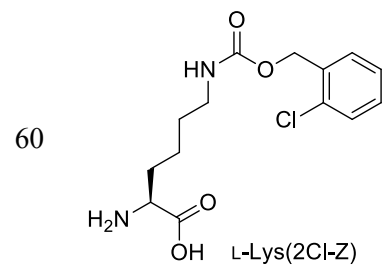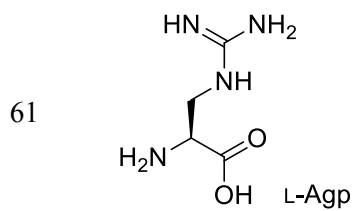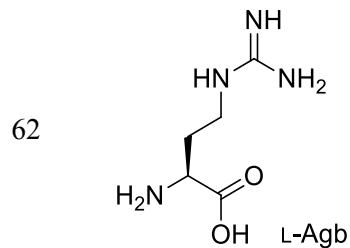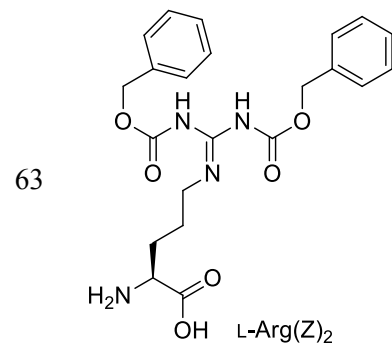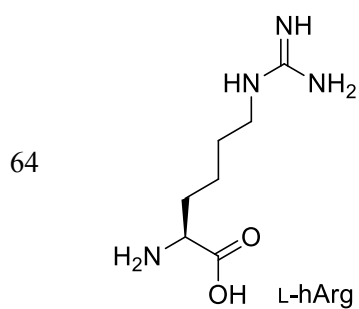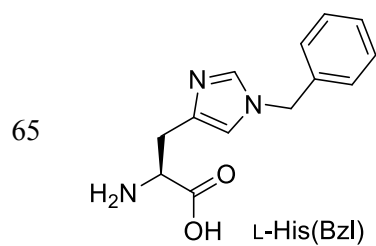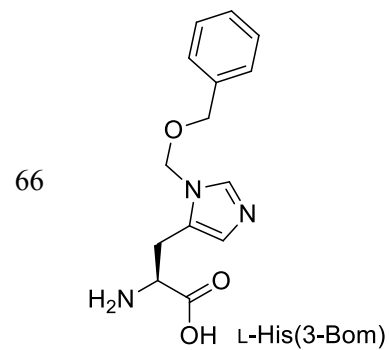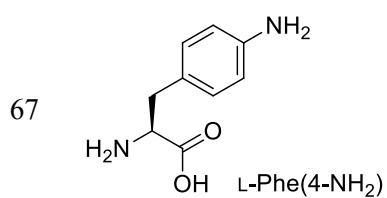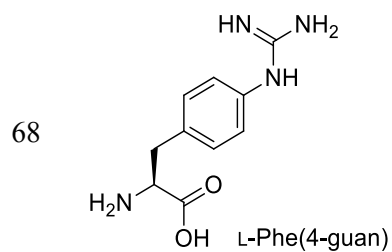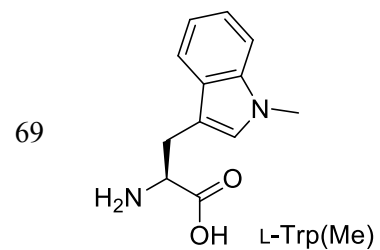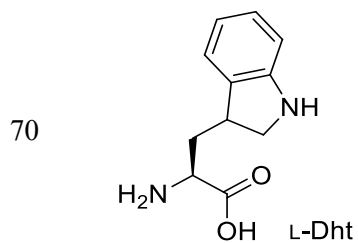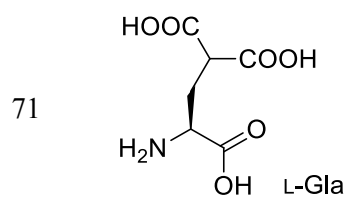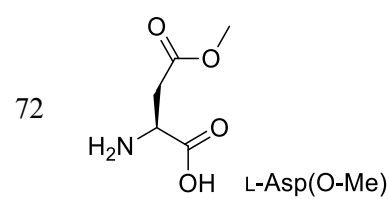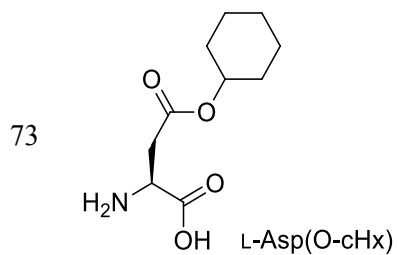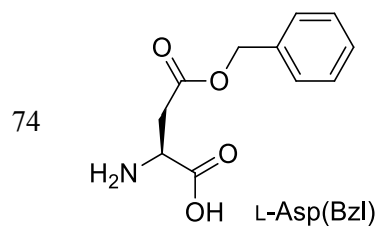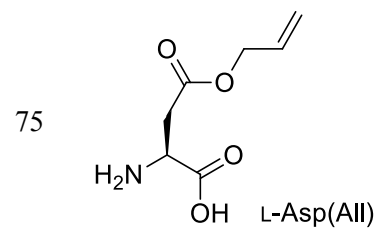



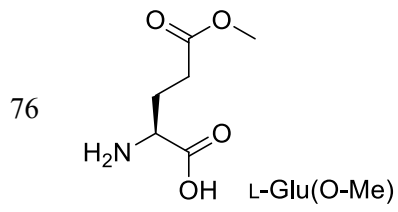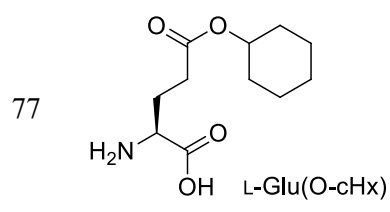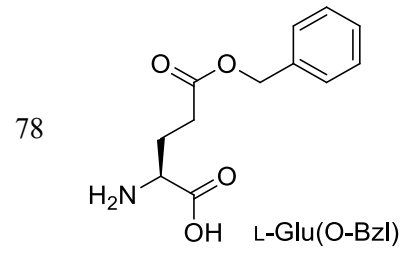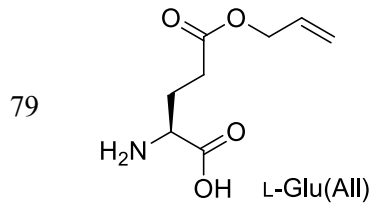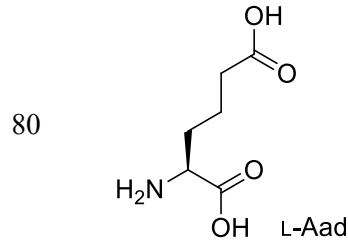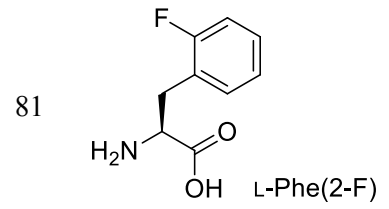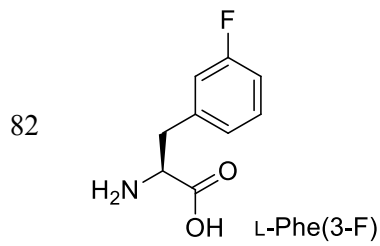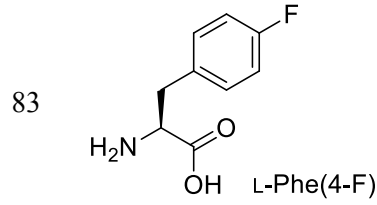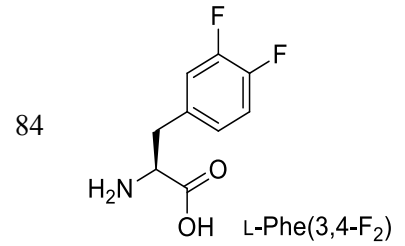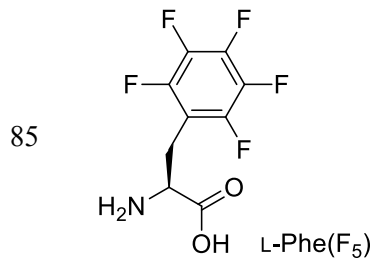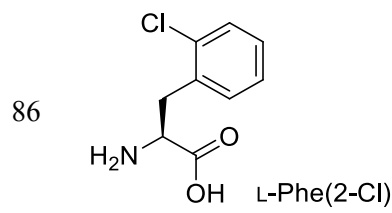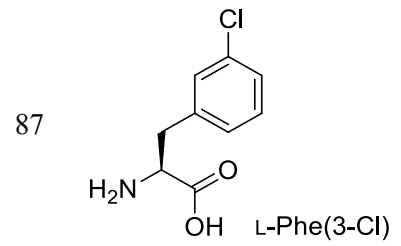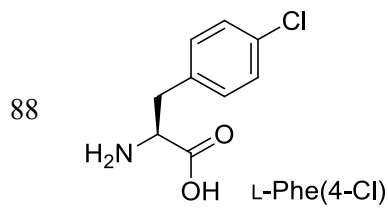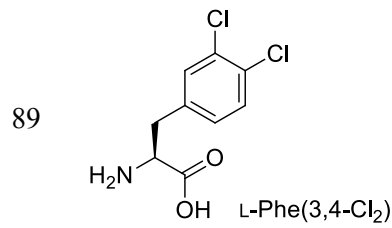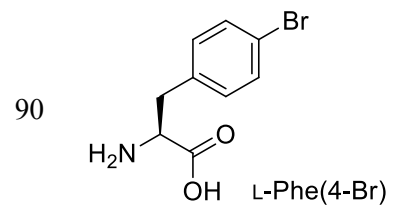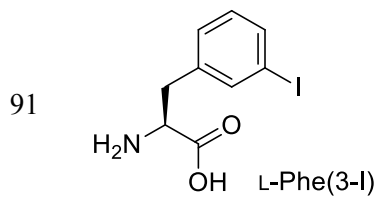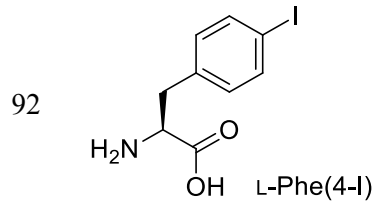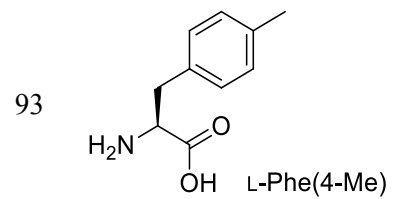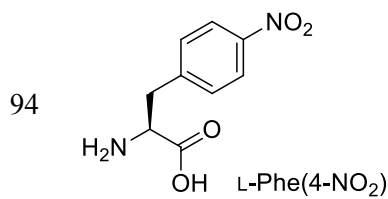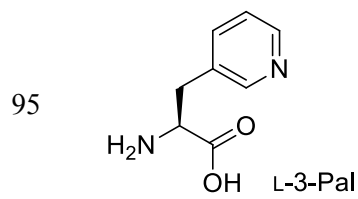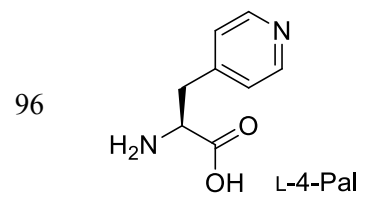

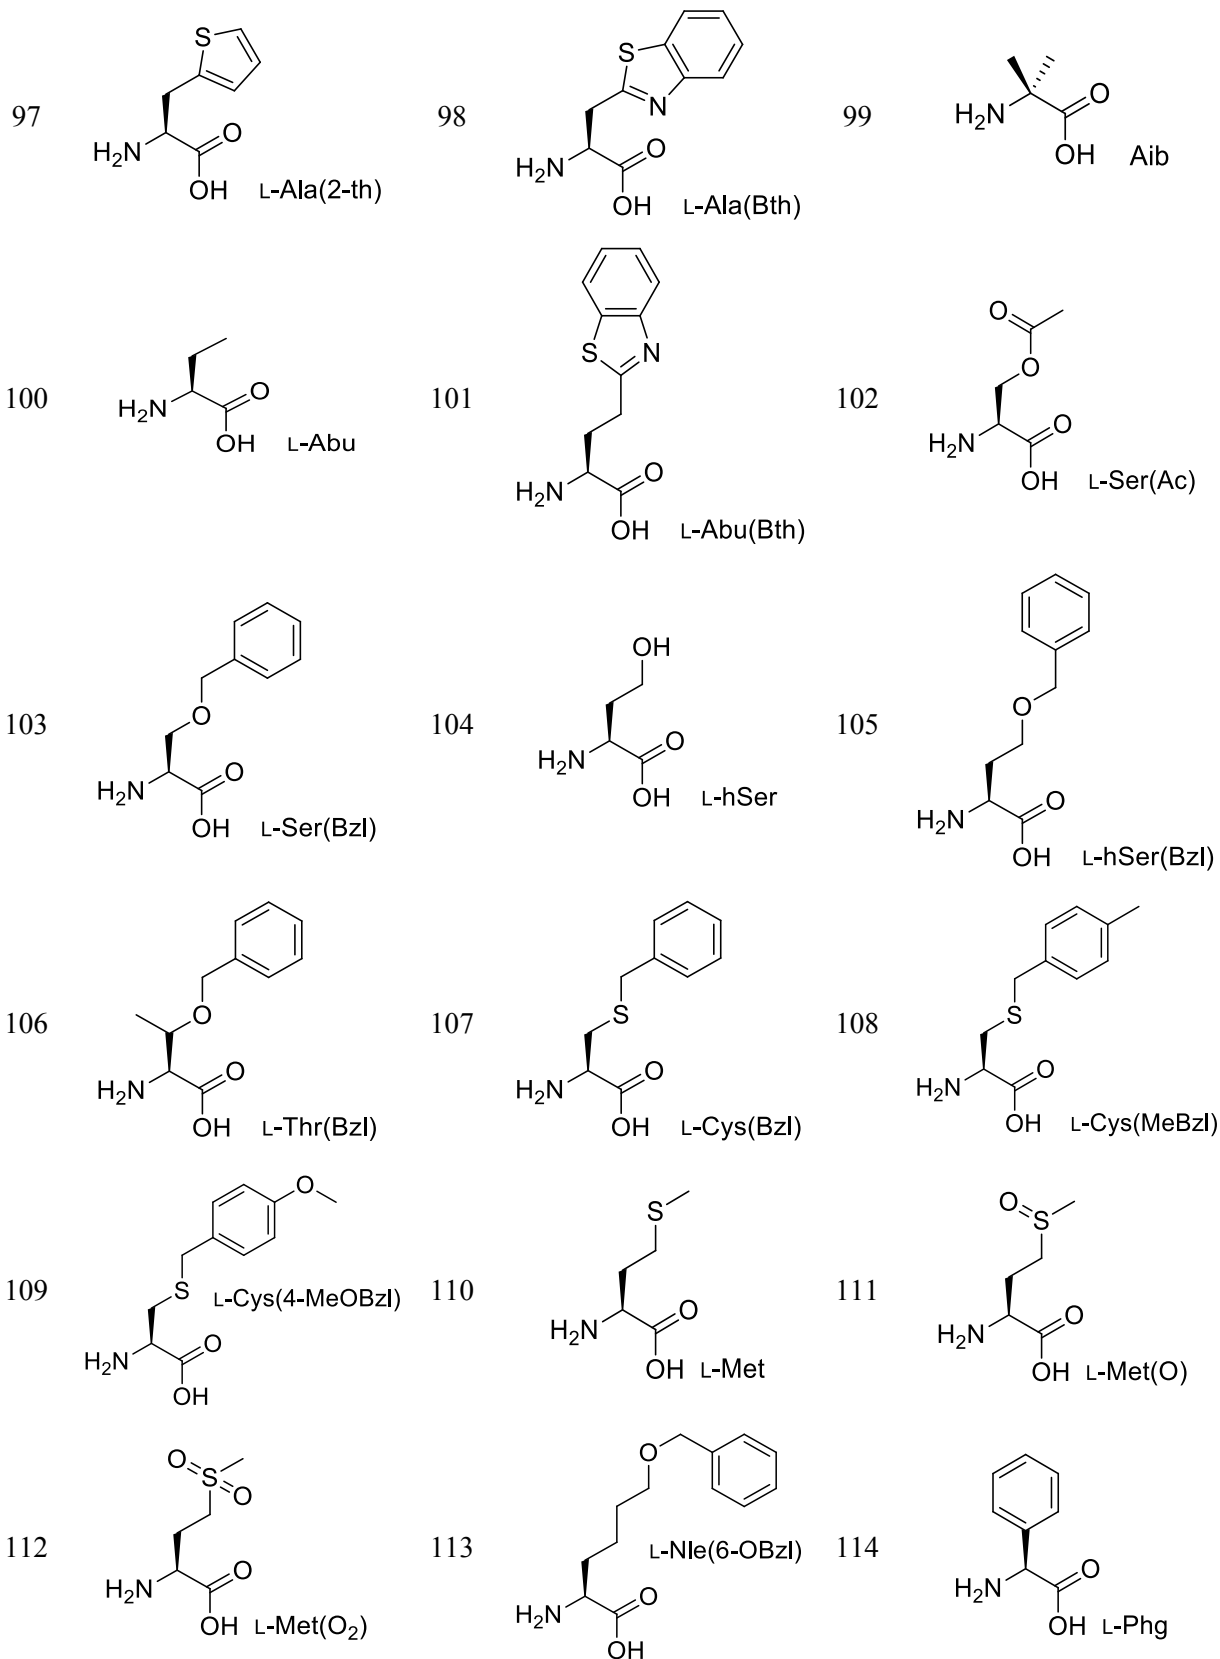

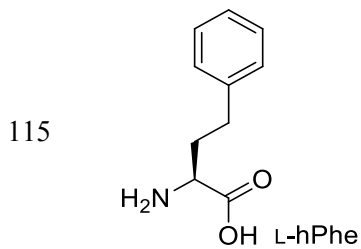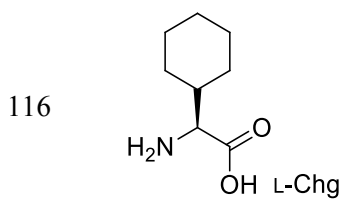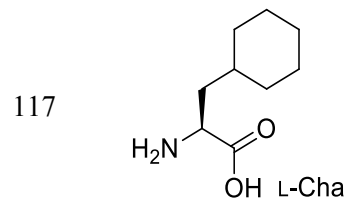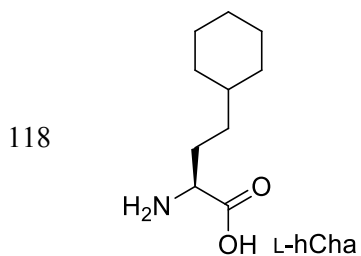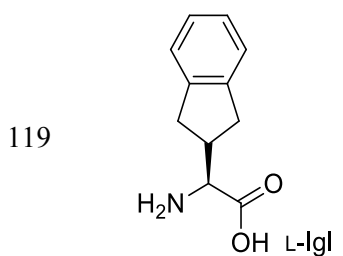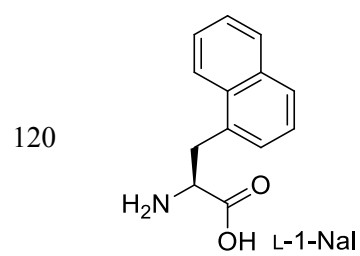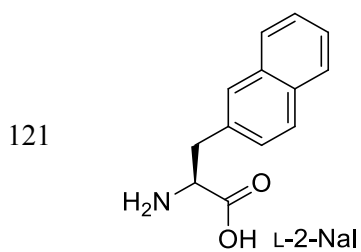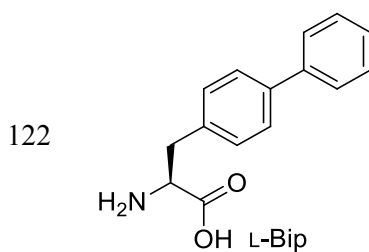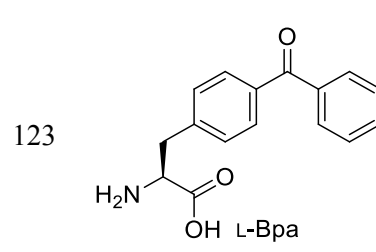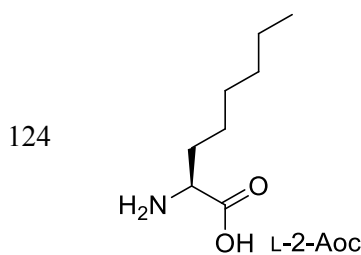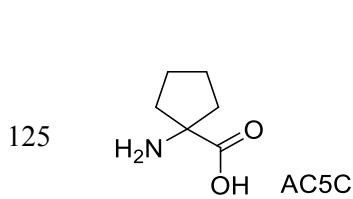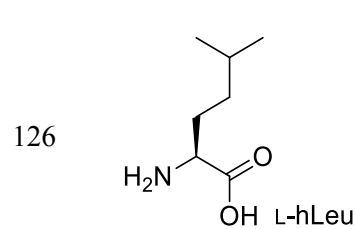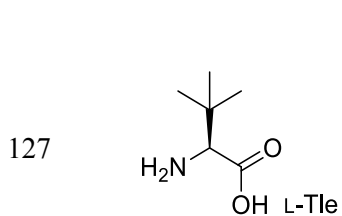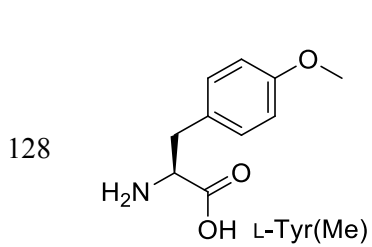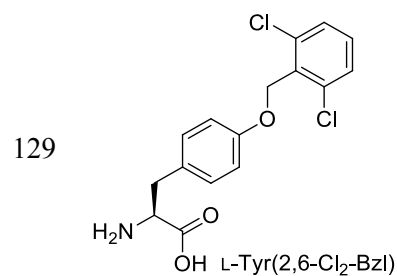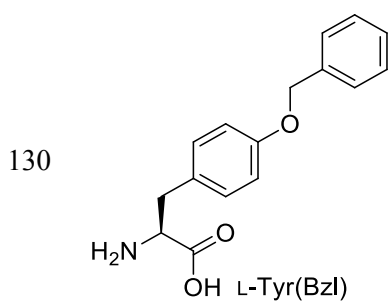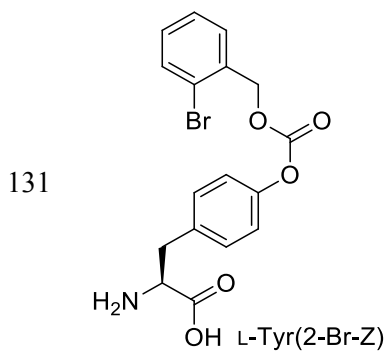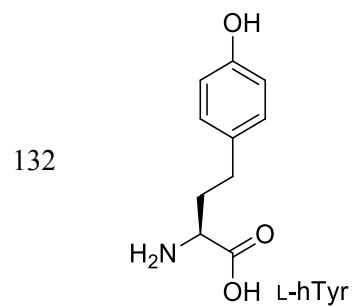

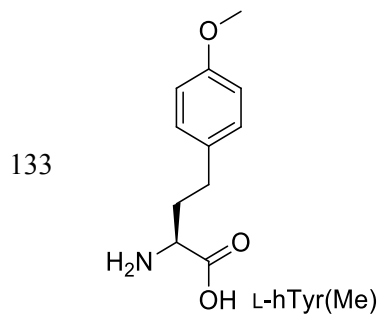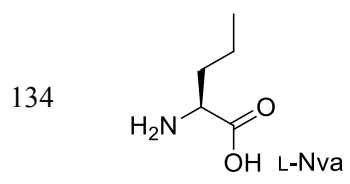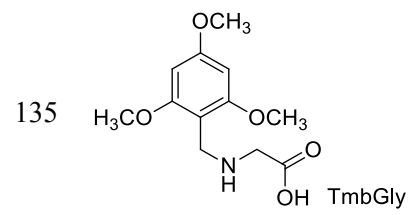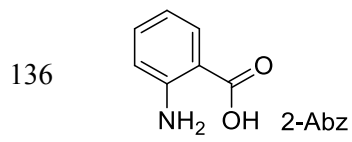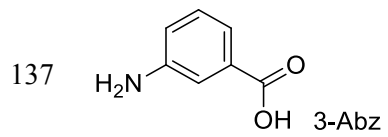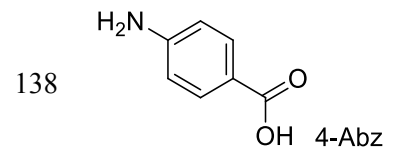

**Supplementary Table 2. Crystallographic Data and Refinement Statistics**

|                                                        | SARS-CoV-2<br>PLpro/VIR250 complex                             | SARS-CoV-2<br>PLpro/VIR251 complex                           |
|--------------------------------------------------------|----------------------------------------------------------------|--------------------------------------------------------------|
| PDB ID                                                 | 6WUU                                                           | 6WX4                                                         |
| Source                                                 | APS 24 IDC                                                     | APS 24 IDC                                                   |
| Wavelength (Å)                                         | 0.979                                                          | 0.979                                                        |
| Resolution Limits (Å)                                  | 94.9-2.79 (2.93-2.79)                                          | 90.7-1.65 (1.68-1.65)                                        |
| Space Group                                            | P2 <sub>1</sub>                                                | I222                                                         |
| Unit Cell (Å) <i>a, b, c</i>                           | 58.4, 189.7, 63.1                                              | 44.9, 113.5, 151.1                                           |
| Unit Cell (°) $\alpha, \beta, \gamma$                  | 90, 98.7, 90                                                   | 90, 90, 90                                                   |
| Number of observations                                 | 237255                                                         | 611490                                                       |
| Number of reflections                                  | 33589 (4431)                                                   | 46470 (2152)                                                 |
| Completeness (%)                                       | 99.6 (99.1)                                                    | 99.5 (91.0)                                                  |
| Mean $I/\sigma I$                                      | 10.1 (1.1)                                                     | 15.5 (1.2)                                                   |
| $CC_{1/2}$                                             | 0.996 (0.437)                                                  | 0.998 (0.531)                                                |
| $R_{\text{merge}}^a$                                   | 0.158 (1.79)                                                   | 0.094 (1.73)                                                 |
| $R_{\text{pim}}$                                       | 0.064 (0.753)                                                  | 0.027 (0.513)                                                |
| <b>Refinement Statistics</b>                           |                                                                |                                                              |
| Resolution Limits (Å)                                  | 94.9-2.79 (2.86-2.79)                                          | 90.7-1.65 (1.70-1.65)                                        |
| # of reflections (work/free)                           | 31489 (1992)                                                   | 44301 (2000)                                                 |
| Completeness (%)                                       | 99.3 (98.0)                                                    | 99.5 (94.0)                                                  |
| Protein/solvent/ligand atoms                           | 10122/8/144                                                    | 2545/194/35                                                  |
| $R_{\text{cryst}}^b$                                   | 0.195 (0.299)                                                  | 0.170 (0.241)                                                |
| $R_{\text{free}}$                                      | 0.230 (0.333)                                                  | 0.196 (0.256)                                                |
| Bonds (Å)/ Angles (°)                                  | 0.004/0.737                                                    | 0.006/0.844                                                  |
| B-factors:<br>protein/solvent/ligand (Å <sup>2</sup> ) | 81.2/84.8/78.2                                                 | 37.7/43.5/30.6                                               |
| Ramachandran plot statistics (%)                       |                                                                |                                                              |
| favored                                                | 95.3                                                           | 97.0                                                         |
| allowed                                                | 4.6                                                            | 3.0                                                          |
| outliers                                               | 0.1                                                            | 0                                                            |
| MolProbity score                                       | 1.48- 100 <sup>th</sup> percentile<br>(N=4482, 2.79 Å ± 0.25Å) | 1.19- 99 <sup>th</sup> percentile<br>(N=789, 1.65 Å ± 0.25Å) |

Parentheses indicate statistics for the high-resolution data bin for x-ray data.

a.  $R_{\text{merge}} = \frac{\sum hkl \sum i |I(hkl)_i - \langle I(hkl) \rangle|}{\sum hkl \sum i \langle I(hkl) \rangle}$ .

b.  $R_{\text{cryst}} = \frac{\sum hkl |F_o(hkl) - F_c(hkl)|}{\sum hkl |F_o(hkl)|}$ , where  $F_o$  and  $F_c$  are observed and calculated structure factors, respectively.

**Table S3.** Codon optimized DNA and protein sequences of CoV-2 PLpro constructs used in this study.

**Codon optimized SARS CoV-2 PLpro [N-terminal GST tagged]- DNA sequence**

GGATCCCGTGAAGTTCGTACCATTAAGGTGTTTACCACCGTTGATAATATTAATCTGCATACCCAGGT  
GGTGGATATGAGCATGACCTATGGTCAGCAGTTTGGTCCGACCTATCTGGATGGTGCCGATGTTACC  
AAAATTAAGCCGCATAATAGCCATGAAGGTAAAACCTTTTATGTGCTGCCGAATGATGATACCCCTGCG  
TGTGGAAGCCTTTGAATATTATCATACCACCGATCCGAGTTTTCTGGGCCGTTATATGAGTGAAGTGA  
ATCATACCAAAAAATGGAAATATCCGCAGGTTAATGGTCTGACCAGTATTAAGTGGGCAGATAATAAT  
TGTTACCTGGCAACCGCCCTGCTGACCCTGCAGCAGATTGAACTGAAATCAATCCGCCGCCCTG  
CAGGATGCCTATTATCGCGCCCGCGCAGGTGAAGCCGCCAATTTTTGCGCCCTGATTCTGGCATATT  
GTAATAAGACCGTTGGTGAAGTGGGTGACGTGCGTGAAACCATGAGTTATCTGTTTCAGCATGCCAA  
TCTGGATAGTTGTAACGCGTGCTGAATGTTGTTTGCAAAACCTGTGGCCAGCAGCAGACCACCCTG  
AAAGGTGTGGAAGCAGTGATGTATATGGTACCCTGAGCTATGAACAGTTTAAAAAAGGTGTGCAGA  
TTCCGTGTACCTGTGGCAAAACAGGCAACCAAATATCTGGTTCAGCAGGAAAGCCCGTTTGTATGAT  
GAGTGCCCCGCCGCCAGTATGAACTGAAACATGGCACCTTTACCTGTGCAAGTGAATATACCGG  
TAATTATCAGTGTGGTCAATATAAACATATCACCAGTAAAGAAACCCTGTATTGATTGATGGCGCACT  
GCTGACCAAAAAGCAGCGAATATAAAGGCCCGATTACCGATGTTTTCTATAAAGAAAATAGCTACACCA  
CCACCATTAAGCCGTAAGCGGCCG

**Codon optimized SARS CoV-2 PLpro [uncleavable C-terminal 6x His tag]- protein sequence after Precision Protease cleavage of GST tag**

GPLGSREVRTIKVFTTVDNINLHTQVVDMSMTYQQFGPTYLDGADVTKIKPHNSHEGKTFYVLPNDLTL  
RVEAFEYHHTDPSFLGRYMSALNHTKKWKYPQVNGLTSIKWADNNCYLATALLTQQIELKFNPPALQD  
AYRRARAGEAANFCALILAYCNKTVGELGDVRETMSYLFQHANLDSCKRVLNVVCKTCGQQQTLLKQVE  
AVMYMGTLSEYQFKKGVQIPCTCGKQATKYLQQESPVMMSAPPAQYELKHGTFTCASEYTGNYQCG  
HYKHITSKETLYCIDGALLTKSSEYKGPITDVFYKENSYTTTIKP

**Codon optimized SARS CoV-2 PLpro [uncleavable C-terminal 6x His tag]- DNA sequence**

ATGCGTGAAGTTCGTACCATTAAGGTGTTTACCACCGTTGATAATATTAATCTGCATACCCAGGTGGT  
GGATATGAGCATGACCTATGGTCAGCAGTTTGGTCCGACCTATCTGGATGGTGCCGATGTTACCAAA  
ATTAAGCCGCATAATAGCCATGAAGGTAAAACCTTTTATGTGCTGCCGAATGATGATACCCCTGCGTGT  
GGAAGCCTTTGAATATTATCATACCACCGATCCGAGTTTTCTGGGCCGTTATATGAGTGAAGTGA  
ATACCAAAAAATGGAAATATCCGCAGGTTAATGGTCTGACCAGTATTAAGTGGGCAGATAATAATTGT  
TACCTGGCAACCGCCCTGCTGACCCTGCAGCAGATTGAACTGAAATCAATCCGCCGCCCTGCGAG  
GATGCCTATTATCGCGCCCGCGCAGGTGAAGCCGCCAATTTTTGCGCCCTGATTCTGGCATATTGTA  
ATAAGACCGTTGGTGAAGTGGGTGACGTGCGTGAAACCATGAGTTATCTGTTTCAGCATGCCAATCT  
GGATAGTTGTAACGCGTGCTGAATGTTGTTTGCAAAACCTGTGGCCAGCAGCAGACCACCCTGAAA  
GGTGTGGAAGCAGTGATGTATATGGGTACCCTGAGCTATGAACAGTTTAAAAAAGGTGTGCAGATTC  
CGTGTACCTGTGGCAAAACAGGCAACCAAATATCTGGTTCAGCAGGAAAGCCCGTTTGTATGATGAG  
TGCCCCGCCGCCAGTATGAACTGAAACATGGCACCTTTACCTGTGCAAGTGAATATAACCGGTAAT  
TATCAGTGTGGTCAATATAAACATATCACCAGTAAAGAAACCCTGTATTGATTGATGGCGCACTGCT  
GACCAAAAAGCAGCGAATATAAAGGCCCGATTACCGATGTTTTCTATAAAGAAAATAGCTACACCACCA  
CCATTAAGCCGCTCGAGCACCACCACCACCACCTGA

**Codon optimized SARS CoV-2 PLpro [uncleavable C-terminal 6x His tag]- protein sequence**

MREVRTIKVFTTVDNINLHTQVVDMSMTYQQFGPTYLDGADVTKIKPHNSHEGKTFYVLPNDLTLRVEA  
FEYHHTDPSFLGRYMSALNHTKKWKYPQVNGLTSIKWADNNCYLATALLTQQIELKFNPPALQDAYYR  
ARAGEAANFCALILAYCNKTVGELGDVRETMSYLFQHANLDSCKRVLNVVCKTCGQQQTLLKQVEAVMY  
MGTLSEYQFKKGVQIPCTCGKQATKYLQQESPVMMSAPPAQYELKHGTFTCASEYTGNYQCGHYKHI  
TSKETLYCIDGALLTKSSEYKGPITDVFYKENSYTTTIKPLEHHHHHH

# LC-MS analysis of synthesized chemical compounds

## Ac-Leu-Arg-Gly-Gly-ACC

HRMS for  $C_{29}H_{41}N_9O_8$  ( $m/z_{\text{calcd}} = 644.3151$ ;  $m/z_{\text{found}} = 644.3158$ )

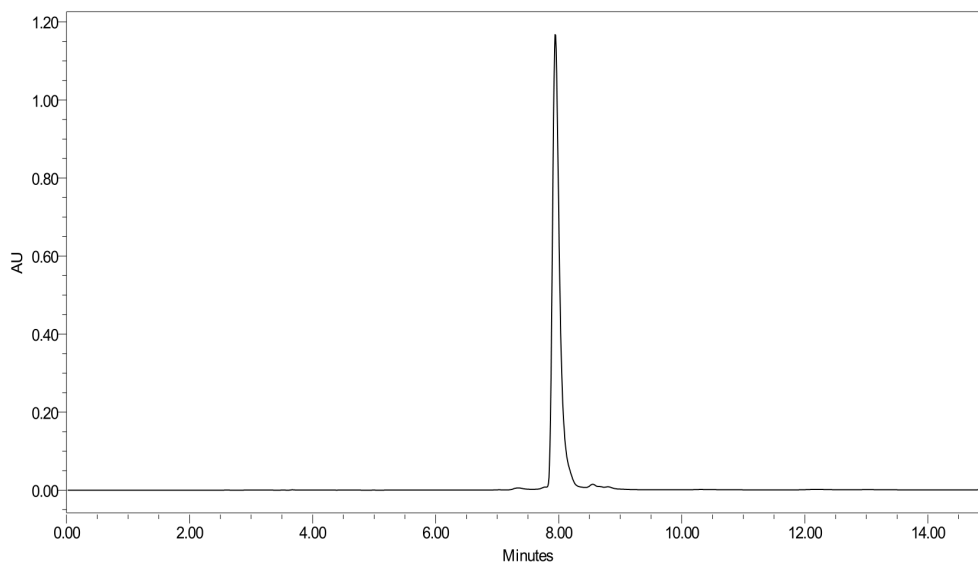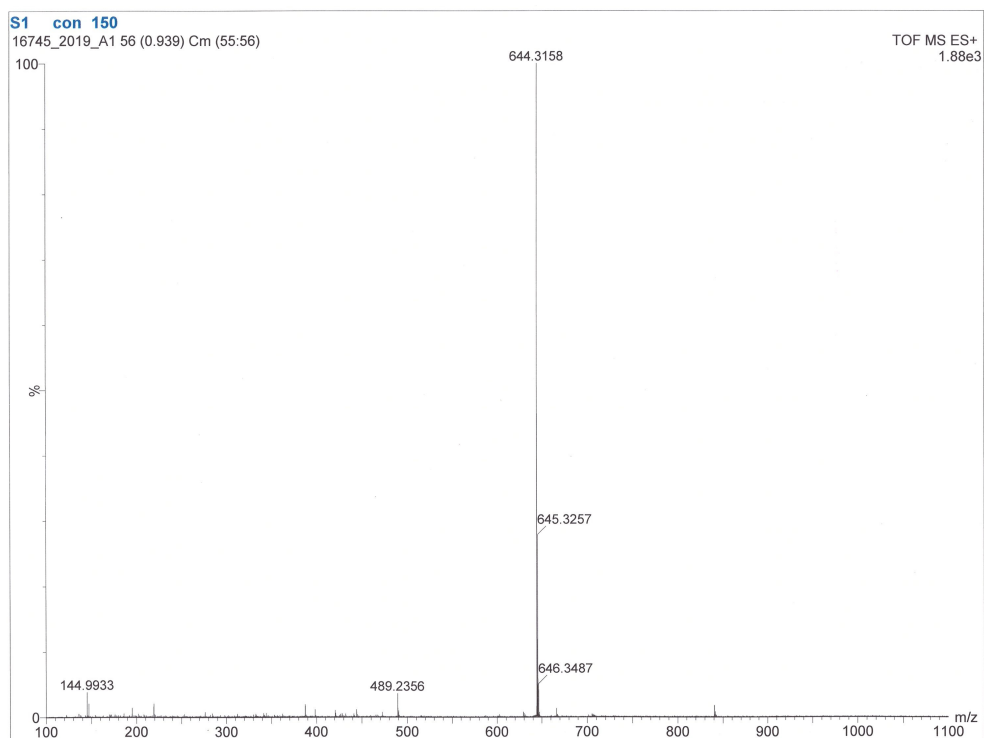

# Ac-Abu(Bth)-Dap-Gly-Gly-ACC

HRMS for  $C_{31}H_{34}N_8O_8S$  ( $m/z_{\text{calcd}} = 679.23$ ;  $m/z_{\text{found}} = 679.12$ )

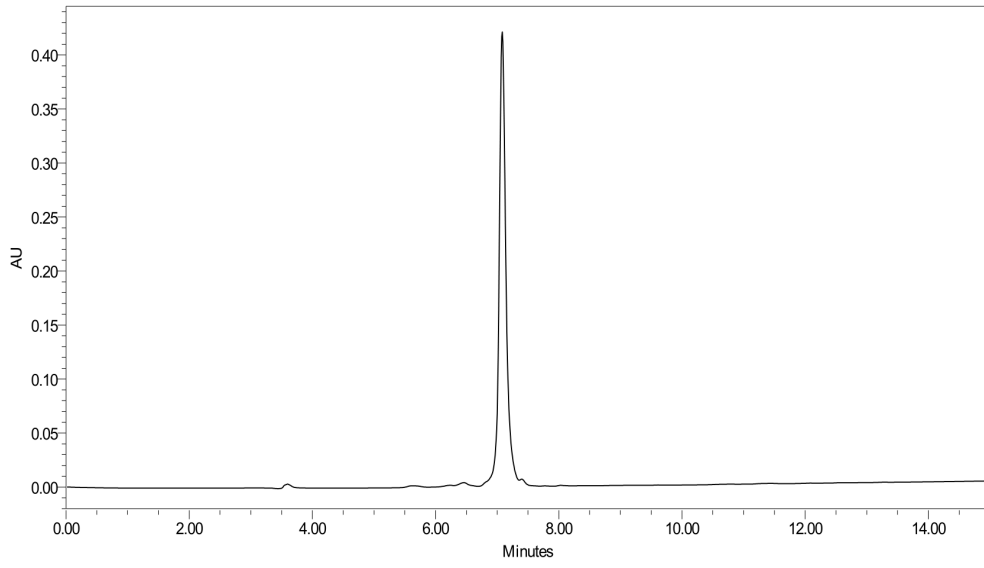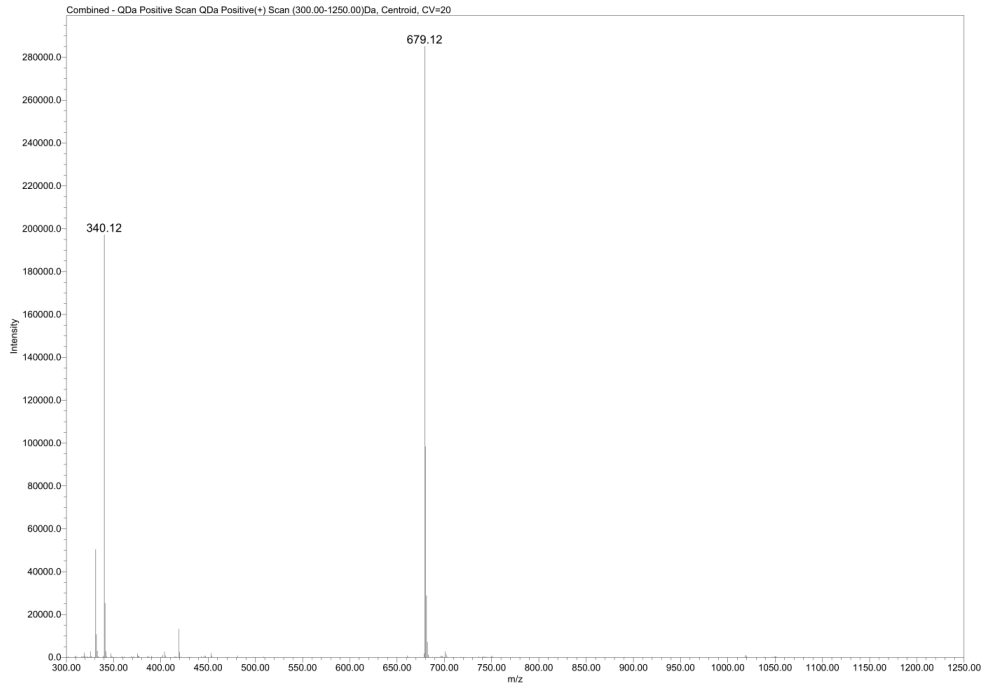



# Ac-Abu(Bth)-Dab-Gly-Gly-ACC

HRMS for  $C_{32}H_{36}N_8O_8S$  ( $m/z_{\text{calcd}} = 693.25$ ;  $m/z_{\text{found}} = 693.13$ )

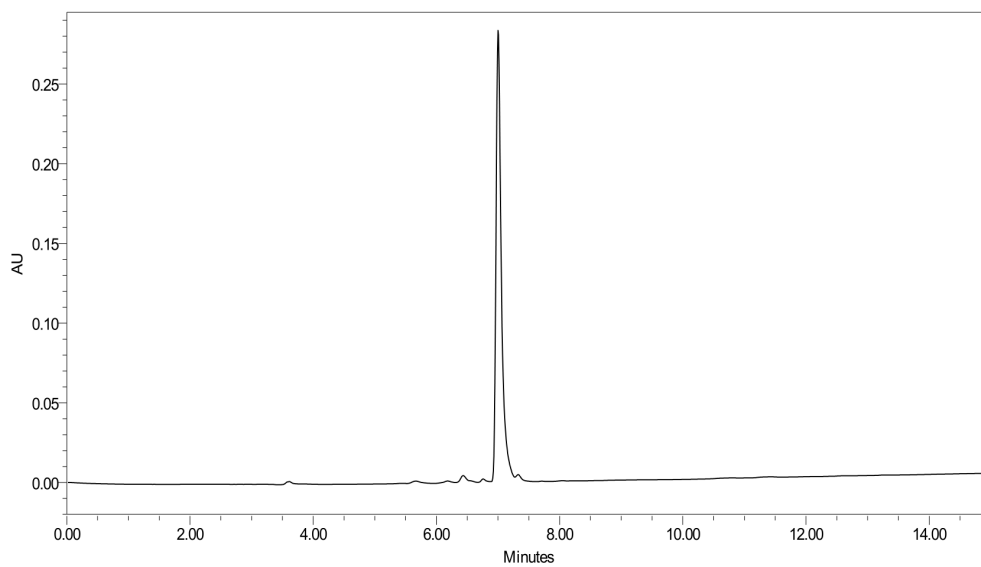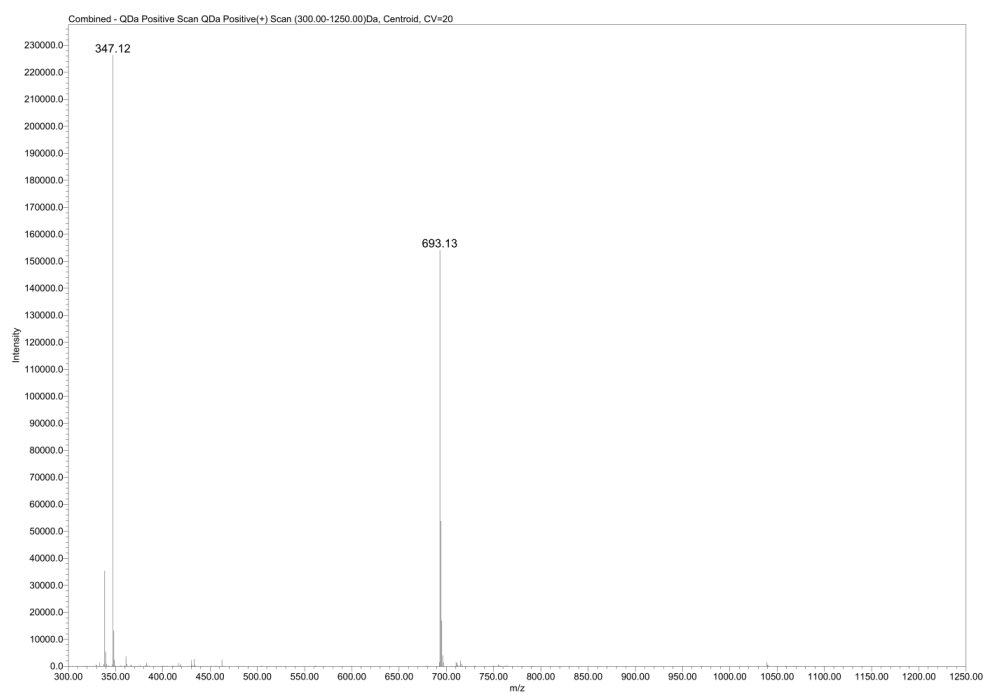

# Ac-hTyr-Phe(guan)-Gly-Gly-ACC

HRMS for  $C_{37}H_{41}N_9O_9$  ( $m/z_{\text{calcd}} = 756.31$ ;  $m/z_{\text{found}} = 756.23$ )

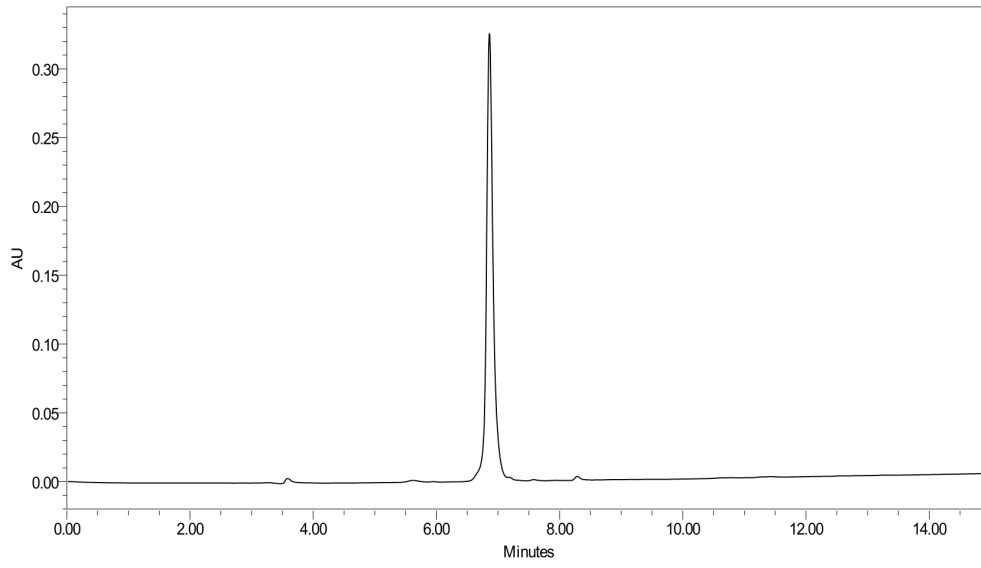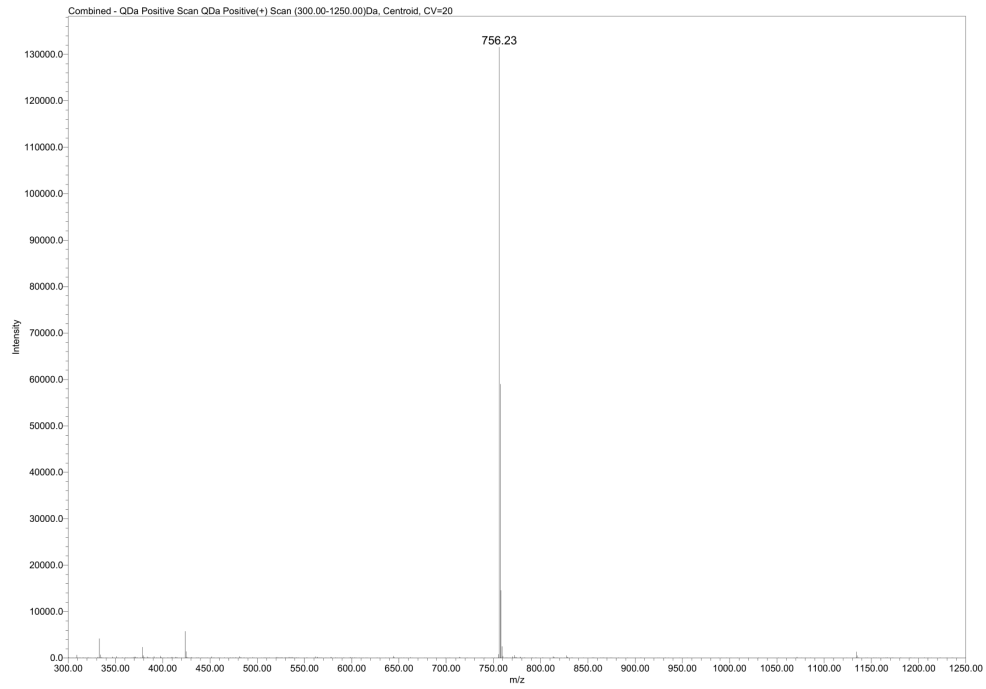

# Ac-hTyr-Dap-Gly-Gly-ACC

HRMS for  $C_{30}H_{35}N_7O_9$  ( $m/z_{\text{calcd}} = 638.26$ ;  $m/z_{\text{found}} = 638.13$ )

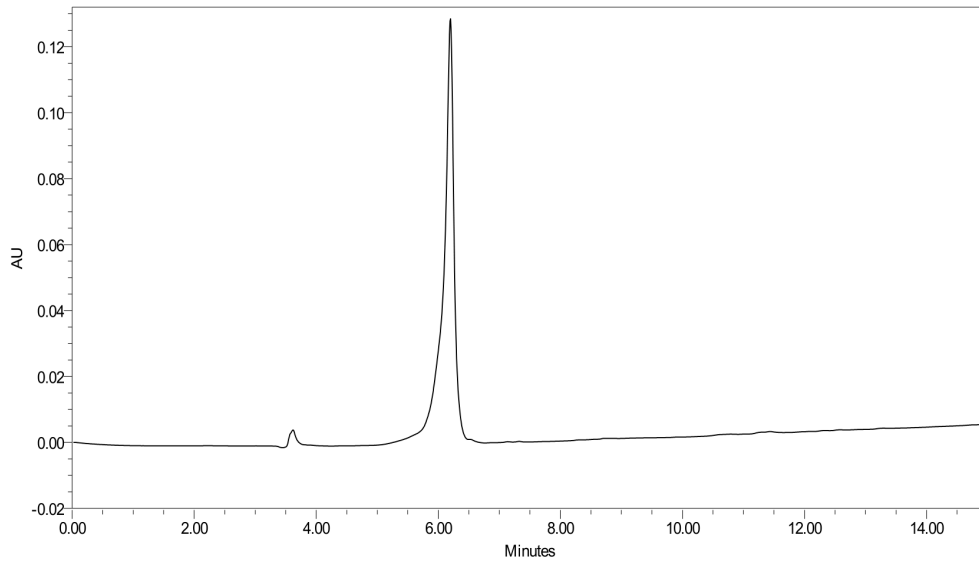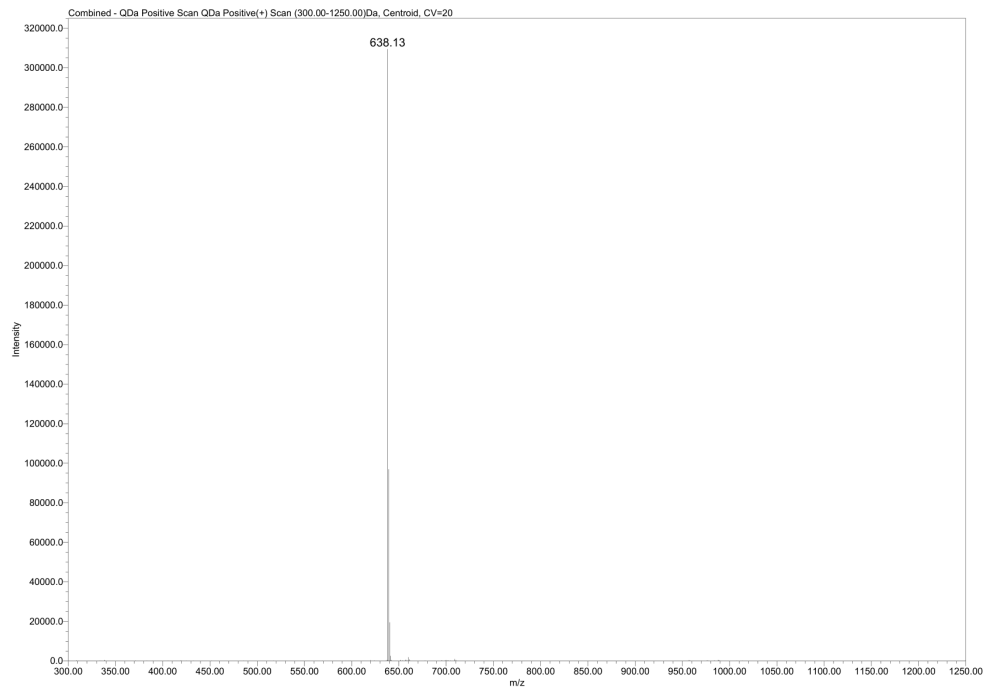

# Ac-hPhe-Dap-Gly-Gly-ACC

HRMS for  $C_{30}H_{35}N_7O_8$  ( $m/z_{\text{calcd}} = 622.26$ ;  $m/z_{\text{found}} = 622.12$ )

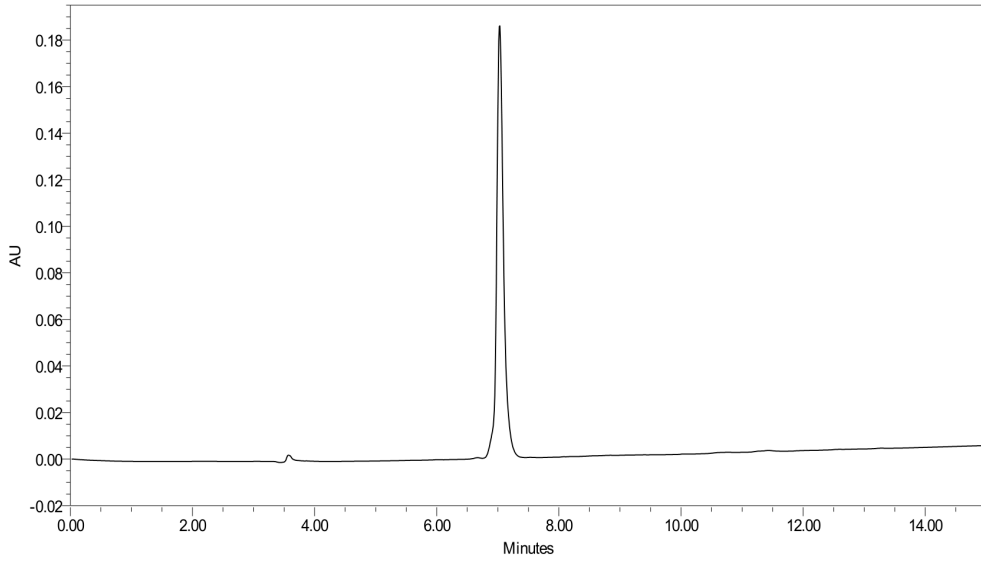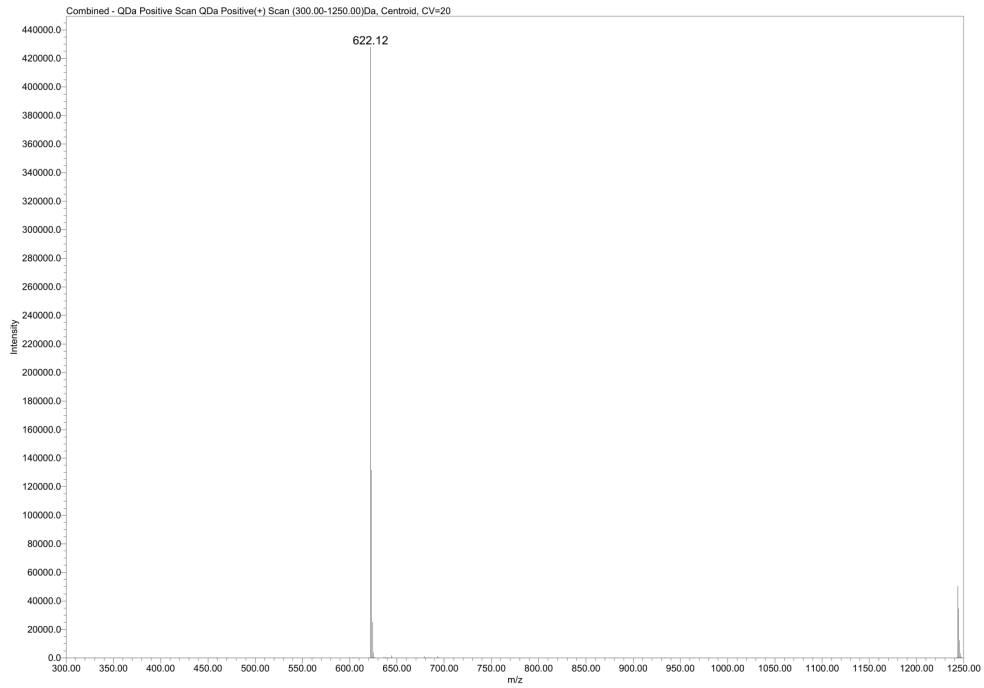

**Ac-Abu(Bth)-Dap-Gly-Gly-VME**  
HRMS for  $C_{23}H_{30}N_6O_6S$  ( $m/z_{\text{calcd}} = 519.2026$ ;  $m/z_{\text{found}} = 519.2034$ )

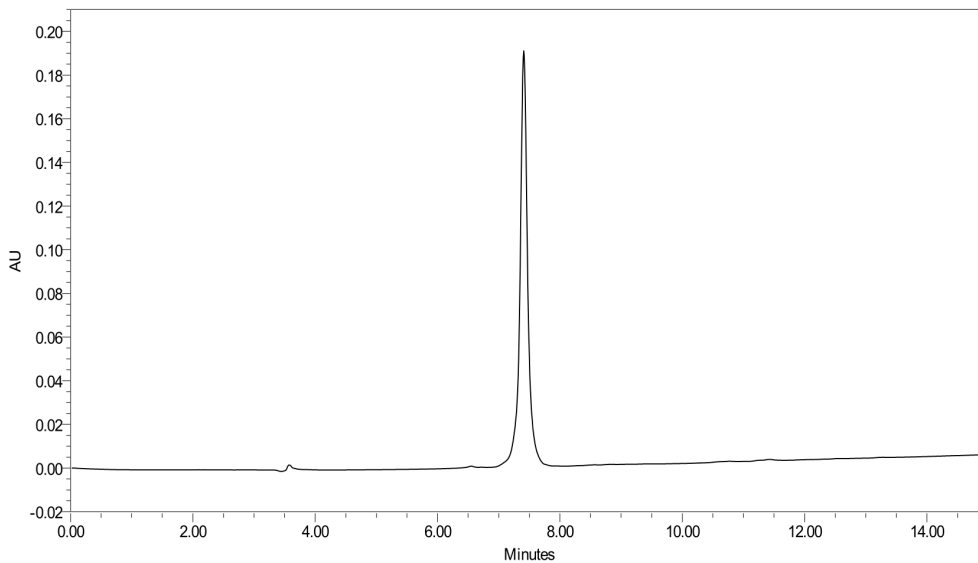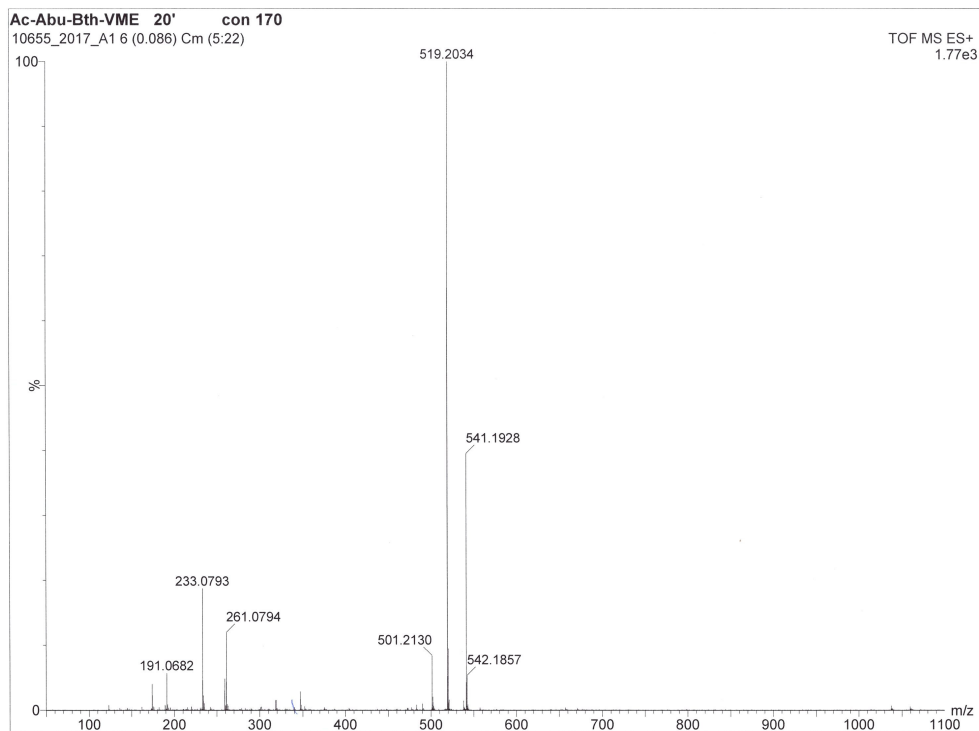

# Ac-hTyr-Dap-Gly-Gly-VME

HRMS for  $C_{22}H_{31}N_5O_7$  ( $m/z_{\text{calcd}} = 478.2302$ ;  $m/z_{\text{found}} = 478.2291$ )

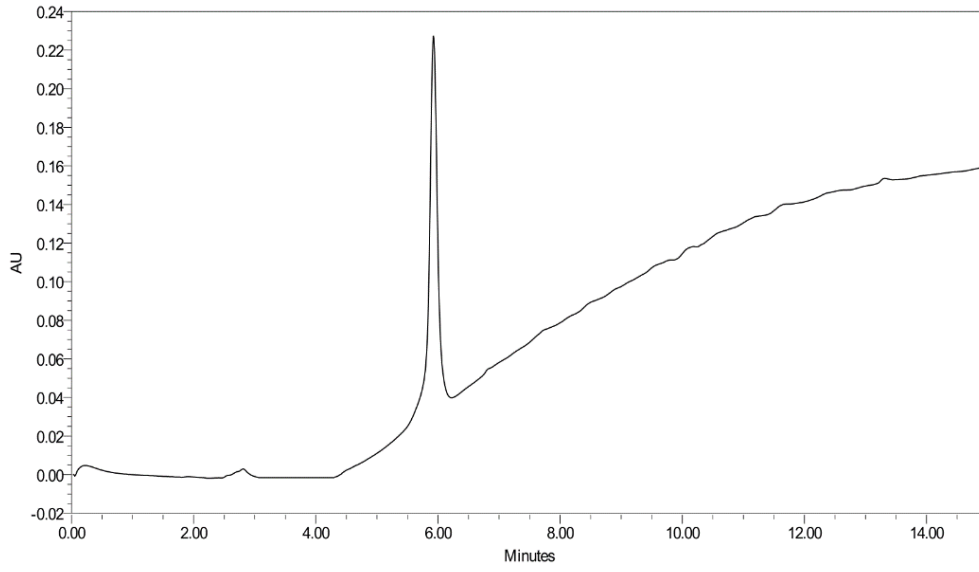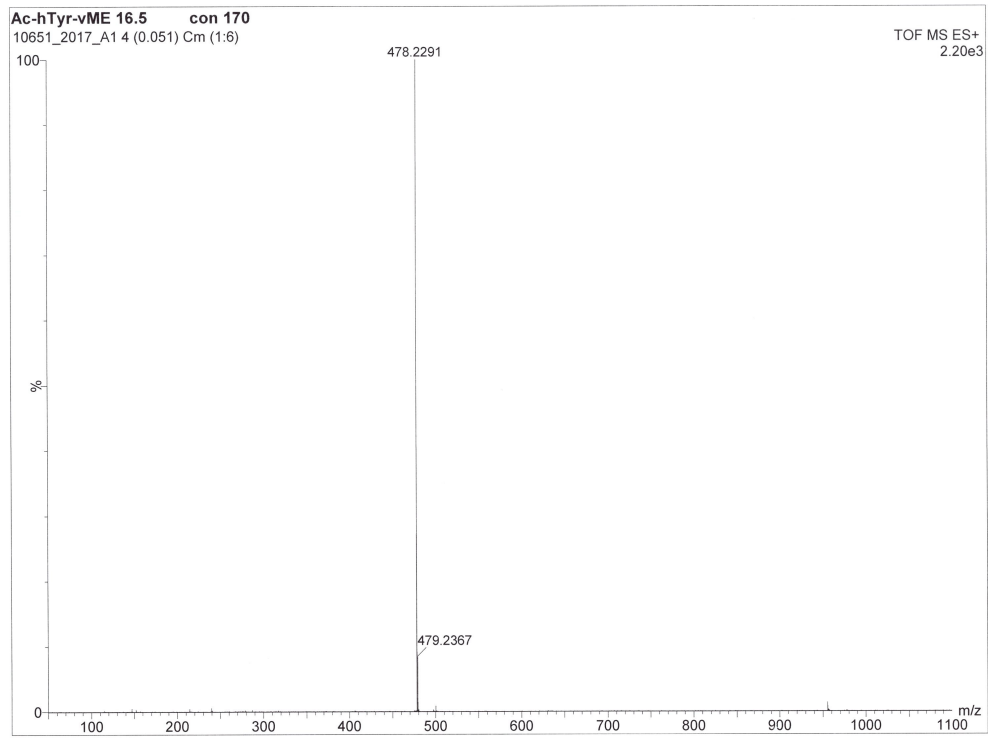

# Ub-ACC

HRMS for C<sub>389</sub>H<sub>637</sub>N<sub>107</sub>O<sub>120</sub>S

| charge | m/z <sub>calcd</sub> | m/z <sub>found</sub> |
|--------|----------------------|----------------------|
| +6     | 1461.6221            | 1461.8839            |
| +7     | 1252.9628            | 1253.2618            |
| +8     | 1096.4684            | 1096.7080            |
| +9     | 974.7505             | 974.9593             |
| +10    | 877.3762             | 877.6428             |
| +11    | 797.7063             | 797.8460             |

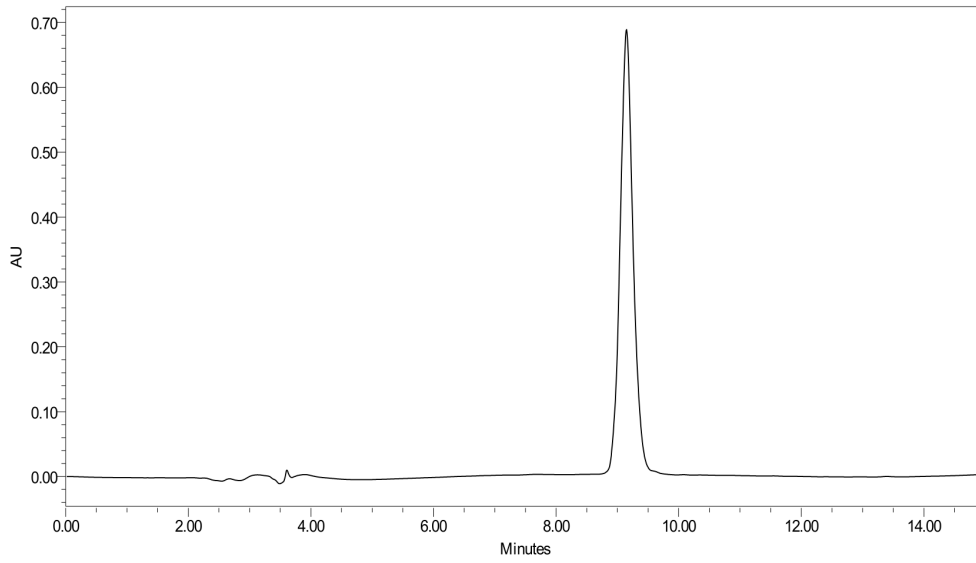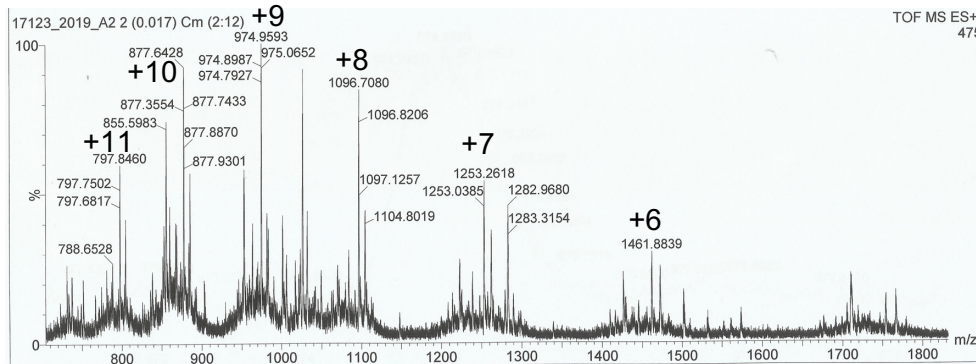

# Biot-6-Ahx-Ub-VME

HRMS for  $C_{397}H_{658}N_{108}O_{121}S_2$

| charge | m/z <sub>calcd</sub> | m/z <sub>found</sub> |
|--------|----------------------|----------------------|
| +6     | 1491.4778            | 1491.8063            |
| +7     | 1278.5535            | 1278.8268            |
| +8     | 1118.8602            | 1119.2485            |
| +9     | 994.6543             | 994.8820             |
| +10    | 895.2896             | 895.3971             |
| +11    | 813.9912             | 814.0791             |
| +12    | 746.2426             | 746.3508             |

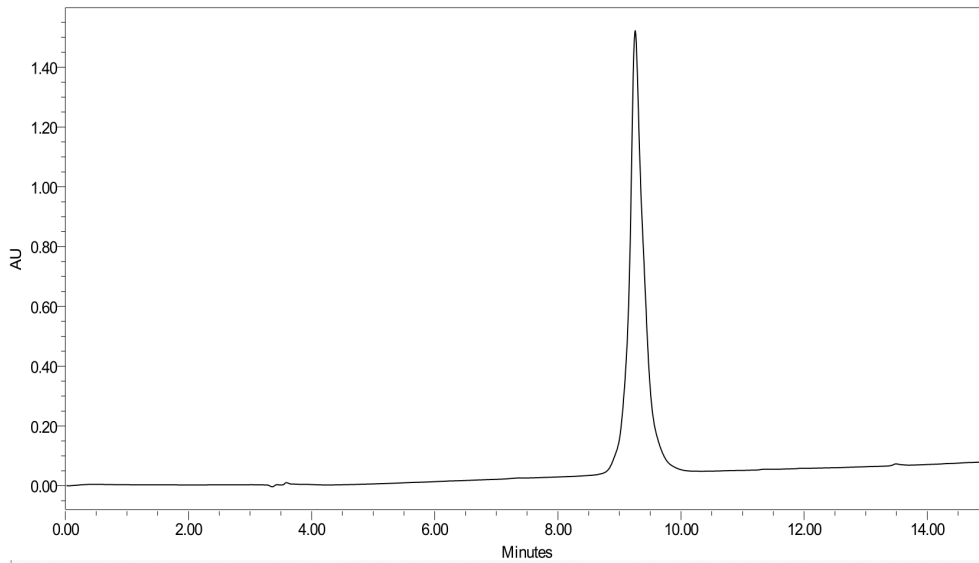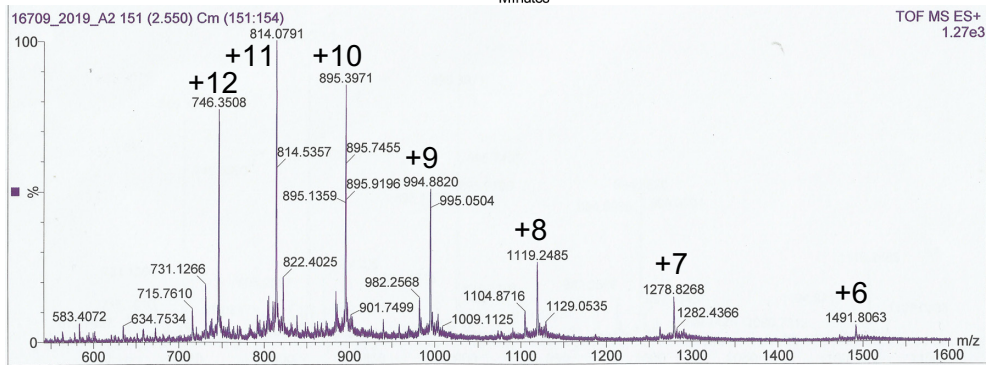

Supplement: abd4596_SM.pdf [file abd4596_SM.pdf]
